# Supplementary material for: One- and two-photon solvatochromism of the fluorescent dye Nile Red and its CF3, F and Br-substituted analogues
Source: Royal Society of Chemistry journal article supplement (doi:10.1039/d0pp00076k), 2020-08-25
Supplement: d0pp00076k1.pdf [file d0pp00076k1.pdf]

## Electronic Supplementary Information (ESI)

### One- and two-photon solvatochromism of the fluorescent dye Nile Red and its CF<sub>3</sub>, F and Br-substituted analogues

Mick Hornum,<sup>a\*</sup> Peter Reinholdt,<sup>a</sup> Jan K. Zaręba,<sup>b</sup> Brian Bjarke Jensen,<sup>c</sup>  
Daniel Wüstner,<sup>c</sup> Marek Samoć,<sup>b</sup> Poul Nielsen<sup>a</sup> and Jacob Kongsted<sup>a</sup>

<sup>a</sup>Department of Physics, Chemistry and Pharmacy, University of Southern Denmark, Campusvej 55, DK-5230 Odense M, Denmark.

<sup>b</sup>Advanced Materials Engineering and Modelling Group, Wrocław University of Science and Technology, Wybrzeże Wyspiańskiego 29, 50-370 Wrocław, Poland. <sup>c</sup>Department of Biochemistry and Molecular Biology, University of Southern Denmark, Campusvej 55, DK-5230 Odense M, Denmark. \*e-mail: hornum@sdu.dk

**Table A1.** Photophysical properties of Nile Red (NR) and the five analogs **1–5** ..... 2

**Figure A1.** Normalized absorption (green) and fluorescence (orange) spectra for Nile Red (NR) and the five analogs **1–5** at concentrations of 3.0 μM in the following six solvents with relative polarities given in parentheses (listed in order of decreasing polarity): MeOH (0.762), DMSO (0.444), acetone (0.355), chloroform (0.259), THF (0.207) and toluene (0.099). ..... 3

**Table A2.** Natural transition orbitals (NTOs) for the five lowest transitions of **1**. ..... 3

**Table A3.** Natural transition orbitals (NTOs) for the five lowest transitions of **2**. ..... 4

**Table A4.** Natural transition orbitals (NTOs) for the five lowest transitions of **3**. ..... 4

**Table A5.** Natural transition orbitals (NTOs) for the five lowest transitions of **4**. ..... 5

**Table A6.** Natural transition orbitals (NTOs) for the five lowest transitions of **5**. ..... 5

**Table A1.** Photophysical properties of Nile Red (NR) and the five analogs 1–5.

| Solute    | Solvent           | Solvent polarity | Absorption $\lambda_{\max}$ [nm] | Emission $\lambda_{\max}$ [nm] | Stokes shift $\Delta\lambda_{\max}$ [nm] | Quantum yield $\Phi$ | Molar extinction coefficient $\epsilon$ [ $10^3 \text{ M}^{-1}\text{cm}^{-1}$ ] | Fluorescence lifetime $\tau$ (ns) | ~1050-nm 2PA band     |                                          |                                     | ~860-nm 2PA band      |                                          |                                     |
|-----------|-------------------|------------------|----------------------------------|--------------------------------|------------------------------------------|----------------------|---------------------------------------------------------------------------------|-----------------------------------|-----------------------|------------------------------------------|-------------------------------------|-----------------------|------------------------------------------|-------------------------------------|
|           |                   |                  |                                  |                                |                                          |                      |                                                                                 |                                   | $\lambda_{\max}$ [nm] | Cross-section $\sigma_{\max}^{2PA}$ [GM] | Brightness $\sigma^{2PA} \Phi$ [GM] | $\lambda_{\max}$ [nm] | Cross-section $\sigma_{\max}^{2PA}$ [GM] | Brightness $\sigma^{2PA} \Phi$ [GM] |
| <b>NR</b> | MeOH              | 0.762            | 550                              | 636                            | 86                                       | 0.40                 | 32.6                                                                            | 2.93                              | 1057                  | 104                                      | 42                                  | 872                   | 20                                       | 8                                   |
|           | DMSO              | 0.444            | 548                              | 627                            | 79                                       | 0.76                 | 32.0                                                                            | 4.11                              | 1063                  | 53                                       | 40                                  | 859                   | 17                                       | 13                                  |
|           | Acetone           | 0.355            | 530                              | 605                            | 75                                       | 0.75                 | 33.2                                                                            | 4.55                              | 1045                  | 89                                       | 67                                  | 871                   | 40                                       | 30                                  |
|           | CHCl <sub>3</sub> | 0.259            | 537                              | 594                            | 57                                       | 0.81                 | 32.6                                                                            | 4.27                              | 1051                  | 65                                       | 53                                  | 875                   | 51                                       | 41                                  |
|           | THF               | 0.207            | 527                              | 588                            | 61                                       | 0.81                 | 27.7                                                                            | 4.17                              | 1038                  | 45                                       | 36                                  | 868                   | 45                                       | 36                                  |
|           | Toluene           | 0.099            | 521                              | 566                            | 45                                       | 0.81                 | 28.9                                                                            | 3.85                              | 1035                  | 32                                       | 26                                  | 874                   | 44                                       | 36                                  |
| <b>1</b>  | MeOH              | 0.762            | 565                              | 638                            | 73                                       | 0.35                 | 36.4                                                                            | 2.36                              | 1057                  | 232                                      | 81                                  | 869                   | 32                                       | 11                                  |
|           | DMSO              | 0.444            | 568                              | 637                            | 69                                       | 0.77                 | 36.3                                                                            | 3.70                              | 1063                  | 144                                      | 111                                 | 850                   | 27                                       | 21                                  |
|           | Acetone           | 0.355            | 549                              | 618                            | 69                                       | 0.69                 | 36.1                                                                            | 4.37                              | 1055                  | 165                                      | 114                                 | 858                   | 61                                       | 42                                  |
|           | CHCl <sub>3</sub> | 0.259            | 554                              | 601                            | 47                                       | 0.80                 | 37.2                                                                            | 4.23                              | 1057                  | 185                                      | 148                                 | 863                   | 39                                       | 31                                  |
|           | THF               | 0.207            | 546                              | 603                            | 57                                       | 0.76                 | 33.3                                                                            | 4.07                              | 1042                  | 186                                      | 141                                 | 868                   | 55                                       | 42                                  |
|           | Toluene           | 0.099            | 541                              | 579                            | 38                                       | 0.81                 | 36.3                                                                            | 3.93                              | 1040                  | 75                                       | 61                                  | 871                   | 60                                       | 49                                  |
| <b>2</b>  | MeOH              | 0.762            | 554                              | 631                            | 77                                       | 0.43                 | 36.9                                                                            | 3.04                              | 1055                  | 183                                      | 79                                  | 873                   | 36                                       | 15                                  |
|           | DMSO              | 0.444            | 558                              | 632                            | 74                                       | 0.74                 | 35.5                                                                            | 3.89                              | 1064                  | 107                                      | 79                                  | 855                   | 24                                       | 18                                  |
|           | Acetone           | 0.355            | 541                              | 612                            | 71                                       | 0.70                 | 37.0                                                                            | 4.48                              | 1050                  | 170                                      | 119                                 | 862                   | 62                                       | 43                                  |
|           | CHCl <sub>3</sub> | 0.259            | 543                              | 595                            | 52                                       | 0.78                 | 36.1                                                                            | 4.23                              | 1054                  | 109                                      | 85                                  | 873                   | 46                                       | 36                                  |
|           | THF               | 0.207            | 537                              | 598                            | 61                                       | 0.75                 | 33.0                                                                            | 4.25                              | 1038                  | 120                                      | 90                                  | 868                   | 56                                       | 42                                  |
|           | Toluene           | 0.099            | 530                              | 571                            | 41                                       | 0.76                 | 35.0                                                                            | 3.91                              | 1038                  | 70                                       | 53                                  | 874                   | 74                                       | 56                                  |
| <b>3</b>  | MeOH              | 0.762            | 569                              | 632                            | 63                                       | 0.45                 | 20.8                                                                            | 2.44                              | 1065                  | 123                                      | 55                                  | 867                   | 16                                       | 7                                   |
|           | DMSO              | 0.444            | 570                              | 636                            | 66                                       | 0.70                 | 20.0                                                                            | 3.69                              | 1063                  | 88                                       | 62                                  | 850                   | 18                                       | 13                                  |
|           | Acetone           | 0.355            | 549                              | 615                            | 66                                       | 0.73                 | 20.1                                                                            | 4.37                              | 1052                  | 83                                       | 61                                  | 850                   | 32                                       | 23                                  |
|           | CHCl <sub>3</sub> | 0.259            | 555                              | 603                            | 48                                       | 0.76                 | 20.7                                                                            | 4.26                              | 1058                  | 106                                      | 81                                  | 863                   | 24                                       | 18                                  |
|           | THF               | 0.207            | 546                              | 603                            | 57                                       | 0.80                 | 19.2                                                                            | 4.13                              | 1042                  | 89                                       | 71                                  | 868                   | 27                                       | 22                                  |
|           | Toluene           | 0.099            | 541                              | 578                            | 37                                       | 0.84                 | 17.4                                                                            | 3.94                              | 1037                  | 38                                       | 32                                  | 872                   | 27                                       | 23                                  |
| <b>4</b>  | MeOH              | 0.762            | 551                              | 636                            | 85                                       | 0.37                 | 23.8                                                                            | 2.67                              | 1055                  | 95                                       | 35                                  | 872                   | 18                                       | 7                                   |
|           | DMSO              | 0.444            | 553                              | 633                            | 80                                       | 0.70                 | 23.7                                                                            | 4.03                              | 1063                  | 52                                       | 36                                  | 858                   | 13                                       | 9                                   |
|           | Acetone           | 0.355            | 536                              | 612                            | 76                                       | 0.73                 | 24.4                                                                            | 4.58                              | 1049                  | 67                                       | 49                                  | 869                   | 29                                       | 21                                  |
|           | CHCl <sub>3</sub> | 0.259            | 543                              | 596                            | 53                                       | 0.76                 | 24.0                                                                            | 4.29                              | 1054                  | 65                                       | 49                                  | 874                   | 41                                       | 31                                  |
|           | THF               | 0.207            | 530                              | 595                            | 65                                       | 0.83                 | 19.7                                                                            | 4.39                              | 1039                  | 50                                       | 42                                  | 869                   | 33                                       | 27                                  |
|           | Toluene           | 0.099            | 527                              | 567                            | 40                                       | 0.87                 | 21.2                                                                            | 3.94                              | 1036                  | 23                                       | 20                                  | 873                   | 28                                       | 24                                  |
| <b>5</b>  | MeOH              | 0.762            | 561                              | 637                            | 76                                       | 0.36                 | 27.6                                                                            | 2.71                              | 1057                  | 118                                      | 42                                  | 873                   | 19                                       | 7                                   |
|           | DMSO              | 0.444            | 562                              | 636                            | 74                                       | 0.62                 | 27.0                                                                            | 3.80                              | 1063                  | 66                                       | 41                                  | 857                   | 12                                       | 7                                   |
|           | Acetone           | 0.355            | 543                              | 615                            | 72                                       | 0.70                 | 26.8                                                                            | 4.33                              | 1051                  | 80                                       | 56                                  | 866                   | 29                                       | 20                                  |
|           | CHCl <sub>3</sub> | 0.259            | 550                              | 602                            | 52                                       | 0.78                 | 27.8                                                                            | 4.09                              | 1056                  | 82                                       | 64                                  | 872                   | 26                                       | 20                                  |
|           | THF               | 0.207            | 541                              | 600                            | 59                                       | 0.76                 | 24.9                                                                            | 4.05                              | 1040                  | 66                                       | 50                                  | 868                   | 28                                       | 21                                  |
|           | Toluene           | 0.099            | 534                              | 573                            | 39                                       | 0.78                 | 24.7                                                                            | 3.78                              | 1036                  | 30                                       | 23                                  | 873                   | 31                                       | 24                                  |

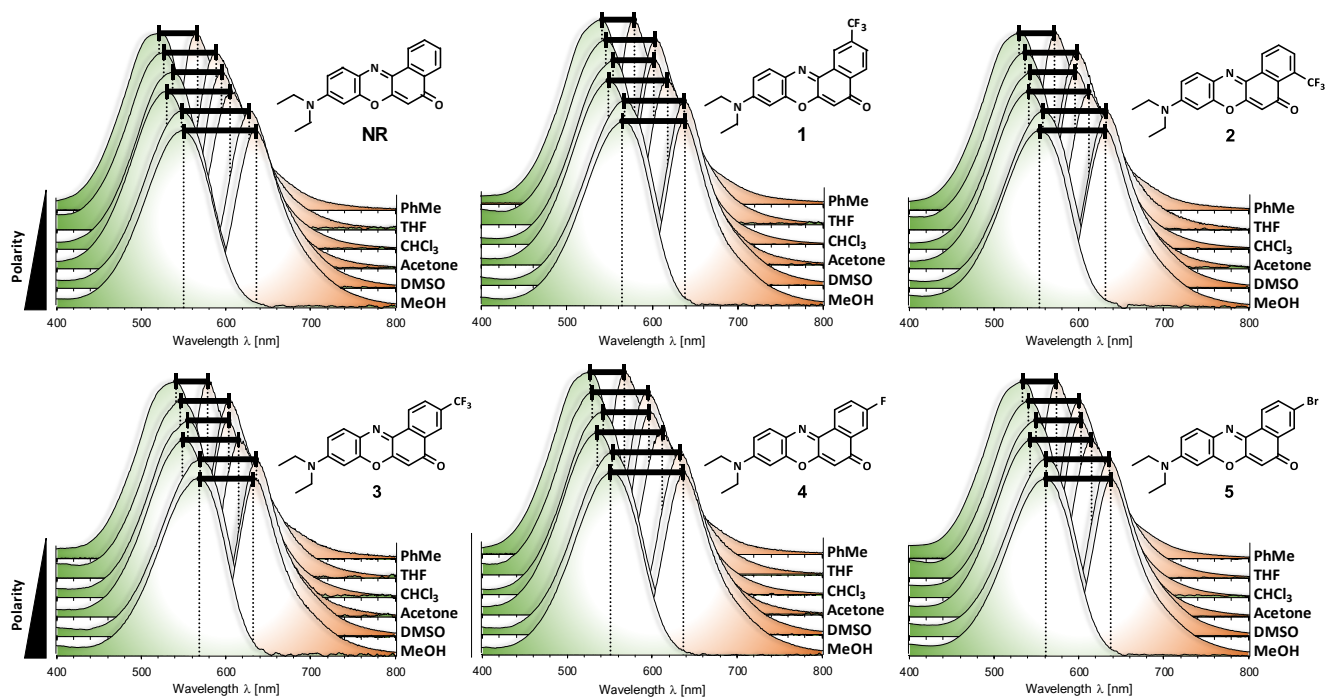

**Figure A1.** Normalized absorption (green) and fluorescence (orange) spectra for Nile Red (NR) and the five analogs 1–5 at concentrations of 3.0  $\mu\text{M}$  in the following six solvents with relative polarities given in parentheses (listed in order of decreasing polarity): MeOH (0.762), DMSO (0.444), acetone (0.355), chloroform (0.259), THF (0.207) and toluene (0.099).

**Table A2.** Natural transition orbitals (NTOs) for the five lowest transitions of **1**.

| State | Occupied NTO | Virtual NTO | Transition              |
|-------|--------------|-------------|-------------------------|
| $S_1$ |              |             | $\pi \rightarrow \pi^*$ |
| $S_2$ |              |             | $n \rightarrow \pi^*$   |
| $S_3$ |              |             | $\pi \rightarrow \pi^*$ |
| $S_4$ |              |             | $\pi \rightarrow \pi^*$ |
| $S_5$ |              |             | $n \rightarrow \pi^*$   |

**Table A3.** Natural transition orbitals (NTOs) for the five lowest transitions of **2**.

| State          | Occupied NTO                                                                       |                      | Virtual NTO                                                                         | Transition              |
|----------------|------------------------------------------------------------------------------------|----------------------|-------------------------------------------------------------------------------------|-------------------------|
| S <sub>1</sub> | 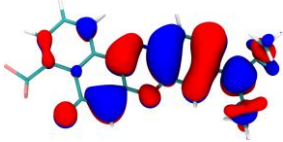  | $\xrightarrow{h\nu}$ |   | $\pi \rightarrow \pi^*$ |
| S <sub>2</sub> |   | $\xrightarrow{h\nu}$ |   | $n \rightarrow \pi^*$   |
| S <sub>3</sub> |   | $\xrightarrow{h\nu}$ |   | $\pi \rightarrow \pi^*$ |
| S <sub>4</sub> |   | $\xrightarrow{h\nu}$ |   | $\pi \rightarrow \pi^*$ |
| S <sub>5</sub> |  | $\xrightarrow{h\nu}$ |  | $n \rightarrow \pi^*$   |

**Table A4.** Natural transition orbitals (NTOs) for the five lowest transitions of **3**.

| State          | Occupied NTO                                                                        |                      | Virtual NTO                                                                          | Transition              |
|----------------|-------------------------------------------------------------------------------------|----------------------|--------------------------------------------------------------------------------------|-------------------------|
| S <sub>1</sub> | 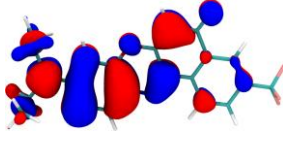 | $\xrightarrow{h\nu}$ |  | $\pi \rightarrow \pi^*$ |
| S <sub>2</sub> |  | $\xrightarrow{h\nu}$ |  | $n \rightarrow \pi^*$   |
| S <sub>3</sub> |  | $\xrightarrow{h\nu}$ |  | $\pi \rightarrow \pi^*$ |
| S <sub>4</sub> |  | $\xrightarrow{h\nu}$ |  | $\pi \rightarrow \pi^*$ |
| S <sub>5</sub> |  | $\xrightarrow{h\nu}$ |  | $n \rightarrow \pi^*$   |

**Table A5.** Natural transition orbitals (NTOs) for the five lowest transitions of **4**.

| State          | Occupied NTO                                                                      |                                                                                   | Virtual NTO                                                                        | Transition              |
|----------------|-----------------------------------------------------------------------------------|-----------------------------------------------------------------------------------|------------------------------------------------------------------------------------|-------------------------|
| S <sub>1</sub> | 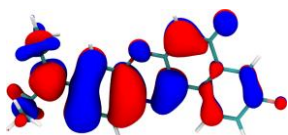 |  |  | $\pi \rightarrow \pi^*$ |
| S <sub>2</sub> |  |  |  | $n \rightarrow \pi^*$   |
| S <sub>3</sub> |  |  |  | $\pi \rightarrow \pi^*$ |
| S <sub>4</sub> |  |  |  | $\pi \rightarrow \pi^*$ |
| S <sub>5</sub> |  |  |  | $n \rightarrow \pi^*$   |

**Table A6.** Natural transition orbitals (NTOs) for the five lowest transitions of **5**.

| State          | Occupied NTO                                                                        |                                                                                     | Virtual NTO                                                                          | Transition              |
|----------------|-------------------------------------------------------------------------------------|-------------------------------------------------------------------------------------|--------------------------------------------------------------------------------------|-------------------------|
| S <sub>1</sub> | 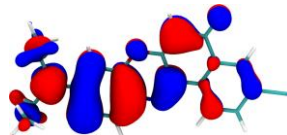 |  |  | $\pi \rightarrow \pi^*$ |
| S <sub>2</sub> |  |  |  | $n \rightarrow \pi^*$   |
| S <sub>3</sub> |  |  |  | $\pi \rightarrow \pi^*$ |
| S <sub>4</sub> |  |  |  | $\pi \rightarrow \pi^*$ |
| S <sub>5</sub> |  |  |  | $n \rightarrow \pi^*$   |
